# Supplementary material for: Physiochemical Characterization of Lipidic Nanoformulations Encapsulating the Antifungal Drug Natamycin
Source: MDPI journal article supplement (doi:10.3390/nano14080726), 2024-04-20
Supplement: s1 [file s1]

# supporting material

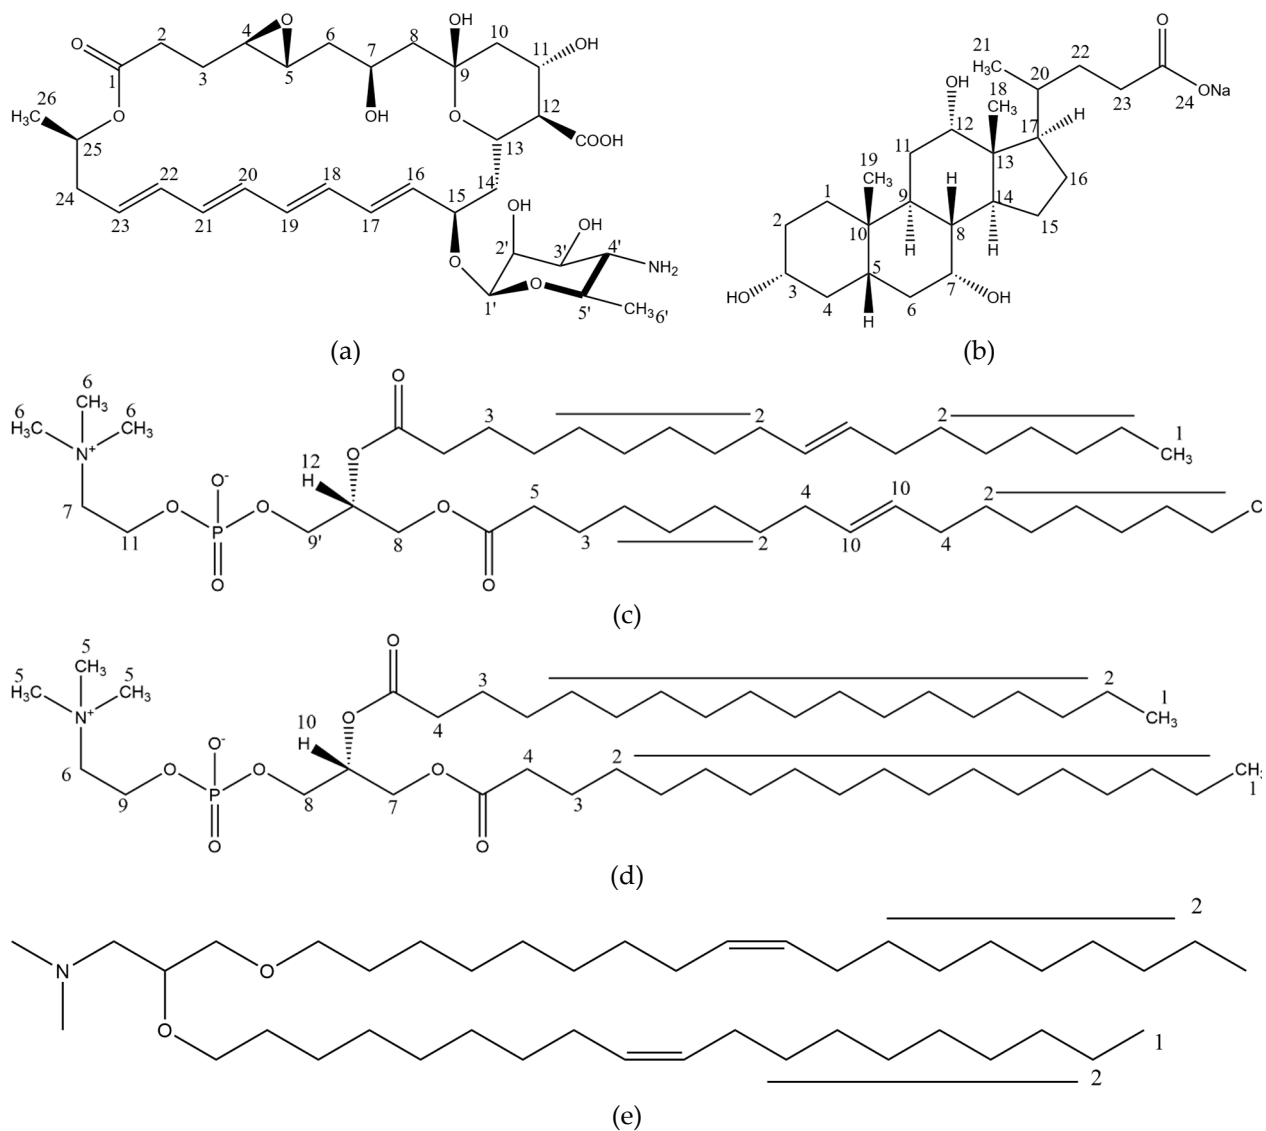

Figure S1: Structures of Natamycin (a), Sodium Cholate (b), Soy PC (c), DSPC (d), DODMA (e) with respective numeration used in NMR peak assignments

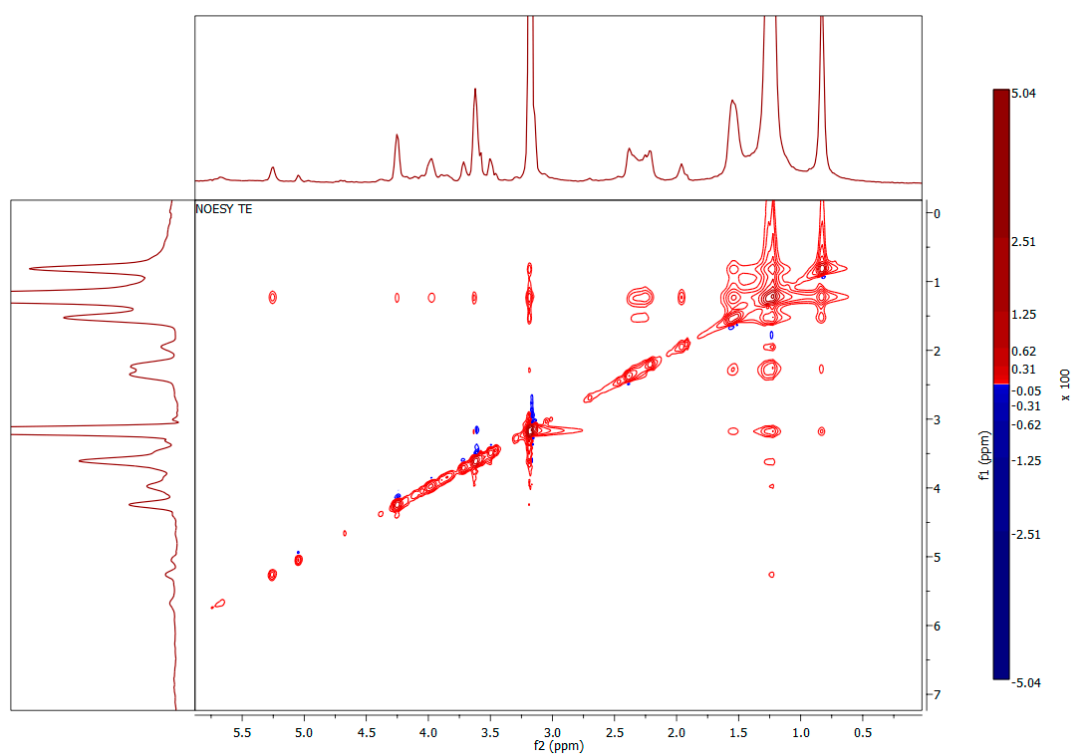

(a)

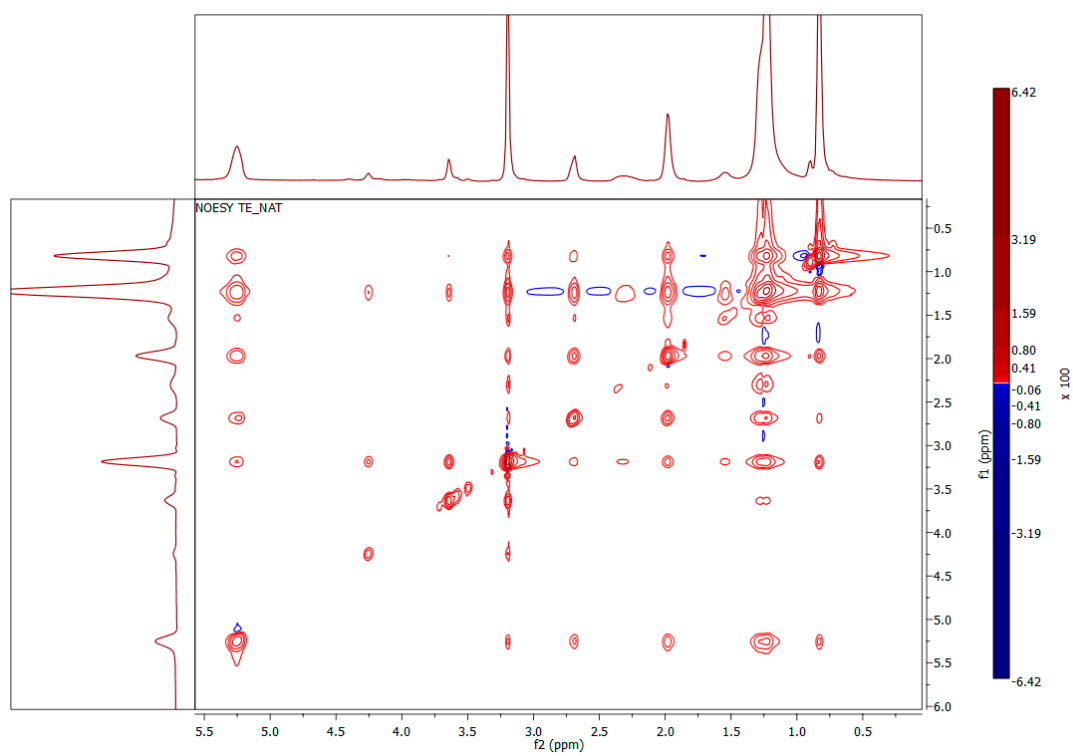

(b)

Figure S2: NOESY spectra of transethosomes (a) and Natamycin-loaded transethosomes (b).

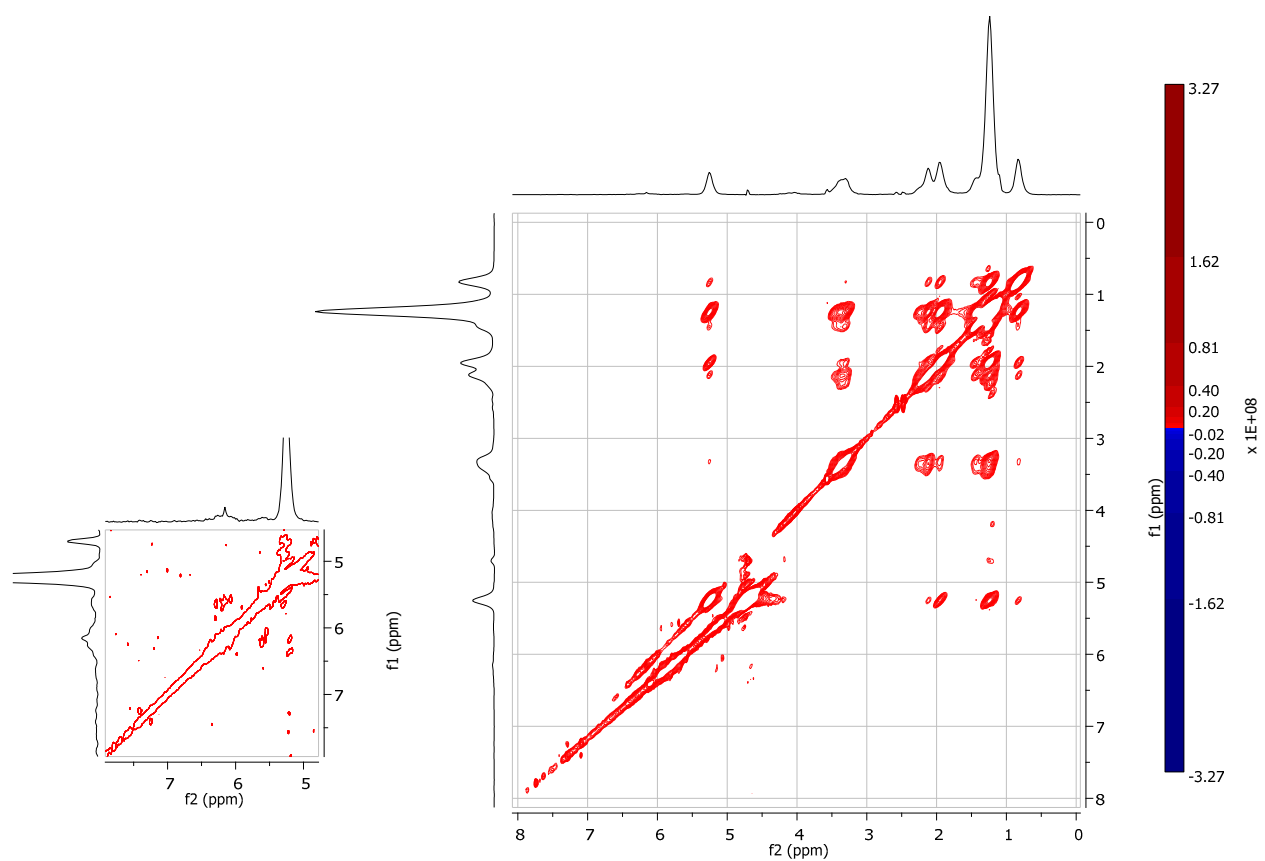

Figure S3: NOESY spectra of representative NAT-loaded LNP (right) with enlargement (left) of aromatic signals range.
